# Supplementary material
Source: PubMed Central journal article supplement (PMC4105363)
Supplement: NIHMS600487-supplement-02.pdf [file NIHMS600487-supplement-02.pdf]

## Supplemental Experimental Procedures: Antibodies

| Primary antibodies | Name                                               | Dilution | Description           | Source                          |
|--------------------|----------------------------------------------------|----------|-----------------------|---------------------------------|
| AR                 | androgen receptor                                  | 1:200    | Rabbit polyclonal     | Santa Cruz (sc-816)             |
| DMRT1              | doublesex and mab-3 related transcription factor 1 | 1:200    | Rabbit polyclonal     | PMID: 11040213                  |
| FOXL2              | forkhead box L2                                    | 1:200    | Goat polyclonal       | Abcam (ab5096)                  |
| GATA1              | GATA binding protein 1                             | 1:200    | Rat polyclonal        | Santa Cruz (sc-265)             |
| GATA4              | GATA binding protein 4                             | 1:200    | Goat polyclonal       | Santa Cruz (sc-1237)            |
| SOX8               | SRY-related protein 8                              | 1:200    | Guinea pig polyclonal | Michael Wegner, PMID: 15893981  |
| SOX9               | SRY-related protein 8                              | 1:200    | Rabbit polyclonal     | Millipore (AB5535)              |
| STRA8              | stimulated by retinoic acid 8                      | 1:200    | Rabbit polyclonal     | Michael Griswold PMID: 20650878 |
| TRA98              | n/a                                                | 1:200    | Rat monoclonal        | Bio Academia (73-003)           |
